# Supplementary material for: Risk of second primary cancers after a diagnosis of first primary cancer: A pan-cancer analysis and Mendelian randomization study
Source: eLife. 2023 Nov 2;12:e86379. doi: 10.7554/eLife.86379 (PMC10622143; doi:10.7554/eLife.86379)
Supplement: Supplementary file 1. [file elife-86379-supp1.xlsx]

## Sheet: 1a
Supplementary file 1a. SIR of different types of cancers in patients with malignancies in the oral cavity and pharynx.
No.	Second primary tumor site	SEER Oral Cavity and Pharynx, non-Hispanic White (n =92,575)
		Obs	Exp	SIR	95% CI
1	Oral Cavity and Pharynx	/	/	/	/
2	Esophagus	413	85	4.85*	(4.39-5.34)
3	Stomach	135	102	1.33*	(1.11-1.57)
4	Small Intestine	32	30	1.06	(0.73-1.50)
5	Colon and Rectum	730	591	1.24*	(1.15-1.33)
6	Liver	182	114	1.59*	(1.37-1.84)
7	Gallbladder	12	14	0.88	(0.46-1.54)
8	Pancreas	228	187	1.22*	(1.07-1.39)
9	Larynx	266	60	4.42*	(3.91-4.99)
10	Lung and Bronchus	3026	917	3.30*	(3.18-3.42)
11	Bones and Joints	31	6	4.78*	(3.25-6.79)
12	Soft Tissue including Heart	72	38	1.91*	(1.50-2.41)
13	Melanoma of the Skin	439	352	1.25*	(1.13-1.37)
14	Female Breast	434	428	1.01	(0.92-1.11)
15	Male Breast	11	11	0.99	(0.50-1.77)
16	Cervix Uteri	10	14	0.74	(0.35-1.35)
17	Ovary	39	44	0.89	(0.63-1.22)
18	Prostate	1278	1336	0.96	(0.91-1.01)
19	Urinary system	780	665	1.17*	(1.09-1.26)
20	Bladder	476	412	1.15*	(1.05-1.26)
21	Kidney	282	220	1.28*	(1.13-1.44)
22	Renal Pelvis and Ureter	15	26	0.58*	(0.32-0.95)
23	Brain	63	70	0.9	(0.69-1.15)
24	Endocrine System	241	88	2.74*	(2.40-3.11)
25	Thyroid	236	82	2.88*	(2.52-3.27)
26	Lymphoma	349	297	1.18*	(1.06-1.31)
27	Hodgkin Lymphoma	19	16	1.17	(0.70-1.82)
28	Non-Hodgkin Lymphoma	330	280	1.18*	(1.05-1.31)
29	Myeloma	67	93	0.72*	(0.56-0.91)
30	Leukemia	243	189	1.29*	(1.13-1.46)
Abbreviation: SIR, standard incidence ratio; Obs, observed; Exp, expected; CI, confidence interval.

## Sheet: 1b
Supplementary file 1b. SIR of different types of cancers in patients with malignancies in the esophagus.
No.	Second primary tumor site	SEER Esophagus, non-Hispanic White (n =33,669)
		Obs	Exp	SIR	95% CI
1	Oral Cavity and Pharynx	111	34	3.25*	(2.68-3.92)
2	Esophagus	/	/	/	/
3	Stomach	112	21	5.46*	(4.49-6.57)
4	Small Intestine	18	6	3.19*	(1.89-5.04)
5	Colon and Rectum	95	115	0.83	(0.67-1.01)
6	Liver	31	21	1.49*	(1.02-2.12)
7	Gallbladder	2	3	0.8	(0.10-2.89)
8	Pancreas	39	36	1.08	(0.77-1.48)
9	Larynx	23	12	1.90*	(1.20-2.85)
10	Lung and Bronchus	328	186	1.76*	(1.58-1.97)
11	Bones and Joints	1	1	0.86	(0.02-4.81)
12	Soft Tissue including Heart	10	7	1.4	(0.67-2.58)
13	Melanoma of the Skin	50	68	0.74*	(0.55-0.98)
14	Female Breast	40	54	0.75	(0.53-1.02)
15	Male Breast	4	2	1.68	(0.46-4.31)
16	Cervix Uteri	1	1	0.69	(0.02-3.83)
17	Ovary	4	6	0.71	(0.19-1.81)
18	Prostate	213	284	0.75*	(0.65-0.86)
19	Urinary system	180	138	1.31*	(1.12-1.51)
20	Bladder	111	90	1.24*	(1.02-1.49)
21	Kidney	63	41	1.52*	(1.17-1.95)
22	Renal Pelvis and Ureter	5	6	0.91	(0.30-2.12)
23	Brain	5	13	0.39*	(0.13-0.91)
24	Endocrine System	26	13	1.98*	(1.30-2.91)
25	Thyroid	25	12	2.08*	(1.34-3.07)
26	Lymphoma	52	57	0.91	(0.68-1.20)
27	Hodgkin Lymphoma	1	3	0.35	(0.01-1.97)
28	Non-Hodgkin Lymphoma	51	54	0.94	(0.70-1.24)
29	Myeloma	5	18	0.27*	(0.09-0.63)
30	Leukemia	52	38	1.38*	(1.03-1.82)
Abbreviation: SIR, standard incidence ratio; Obs, observed; Exp, expected; CI, confidence interval.

## Sheet: 1c
Supplementary file 1c. SIR of different types of cancers in patients with malignancies in the stomach.
No.	Second primary tumor site	SEER Stomach, non-Hispanic White (n = 39,265)
		Obs	Exp	SIR	95% CI
1	Oral Cavity and Pharynx	45	43	1.04	(0.76-1.39)
2	Esophagus	83	22	3.79*	(3.02-4.70)
3	Stomach	/	/	/	/
4	Small Intestine	35	8	4.36*	(3.04-6.06)
5	Colon and Rectum	215	174	1.23*	(1.08-1.41)
6	Liver	31	26	1.21	(0.82-1.71)
7	Gallbladder	1	4	0.22	(0.01-1.25)
8	Pancreas	71	55	1.30*	(1.01-1.64)
9	Larynx	10	15	0.69	(0.33-1.26)
10	Lung and Bronchus	308	269	1.14*	(1.02-1.28)
11	Bones and Joints	1	2	0.6	(0.02-3.36)
12	Soft Tissue including Heart	11	10	1.07	(0.53-1.92)
13	Melanoma of the Skin	94	92	1.03	(0.83-1.26)
14	Female Breast	123	143	0.86	(0.71-1.02)
15	Male Breast	2	3	0.71	(0.09-2.55)
16	Cervix Uteri	4	4	0.99	(0.27-2.52)
17	Ovary	20	15	1.3	(0.80-2.01)
18	Prostate	260	315	0.83*	(0.73-0.93)
19	Urinary system	222	185	1.20*	(1.05-1.37)
20	Bladder	123	121	1.02	(0.84-1.21)
21	Kidney	90	54	1.67*	(1.34-2.05)
22	Renal Pelvis and Ureter	4	8	0.5	(0.14-1.27)
23	Brain	8	18	0.45*	(0.19-0.88)
24	Endocrine System	55	21	2.66*	(2.00-3.46)
25	Thyroid	54	19	2.81*	(2.11-3.67)
26	Lymphoma	89	83	1.07	(0.86-1.32)
27	Hodgkin Lymphoma	3	4	0.76	(0.16-2.23)
28	Non-Hodgkin Lymphoma	86	79	1.08	(0.87-1.34)
29	Myeloma	16	26	0.61*	(0.35-0.99)
30	Leukemia	60	55	1.1	(0.84-1.41)
Abbreviation: SIR, standard incidence ratio; Obs, observed; Exp, expected; CI, confidence interval.

## Sheet: 1d
Supplementary file 1d. SIR of different types of cancers in patients with colorectum cancers.
No.	Second primary tumor site	SEER Non-Hispanic White Colon and Rectum (n = 331,087)
		Obs	Exp	SIR	95% CI
1	Oral Cavity and Pharynx	705	691	1.02	(0.95-1.10)
2	Esophagus	405	342	1.18*	(1.07-1.30)
3	Stomach	537	480	1.12*	(1.03-1.22)
4	Small Intestine	517	135	3.83*	(3.51-4.17)
5	Colon and Rectum	6608	3012	2.19*	(2.14-2.25)
6	Liver	338	405	0.83*	(0.75-0.93)
7	Gallbladder	71	84	0.85	(0.66-1.07)
8	Pancreas	1025	952	1.08*	(1.01-1.14)
9	Larynx	236	222	1.06	(0.93-1.21)
10	Lung and Bronchus	5515	4561	1.21*	(1.18-1.24)
11	Bones and Joints	38	28	1.37	(0.97-1.88)
12	Soft Tissue including Heart	185	172	1.08	(0.93-1.24)
13	Melanoma of the Skin	1417	1480	0.96	(0.91-1.01)
14	Female Breast	3047	3062	1	(0.96-1.03)
15	Male Breast	40	42	0.96	(0.69-1.31)
16	Cervix Uteri	91	84	1.08	(0.87-1.33)
17	Ovary	240	333	0.72*	(0.63-0.82)
18	Prostate	4208	4534	0.93*	(0.90-0.96)
19	Urinary system	3462	2961	1.17*	(1.13-1.21)
20	Bladder	2182	1925	1.13*	(1.09-1.18)
21	Kidney	1074	869	1.24*	(1.16-1.31)
22	Renal Pelvis and Ureter	176	136	1.30*	(1.11-1.50)
23	Brain	260	297	0.88*	(0.77-0.99)
24	Endocrine System	606	361	1.68*	(1.55-1.82)
25	Thyroid	572	336	1.70*	(1.57-1.85)
26	Lymphoma	1341	1412	0.95	(0.90-1.00)
27	Hodgkin Lymphoma	44	65	0.68*	(0.49-0.91)
28	Non-Hodgkin Lymphoma	1297	1347	0.96	(0.91-1.02)
29	Myeloma	371	439	0.85*	(0.76-0.94)
30	Leukemia	871	920	0.95	(0.89-1.01)
Data from SEER 18 Reg (with additional treatment field) Nov 2018 Sub, 2000-2016, excluding <20 yrs, and latency exclusion period was 2 months.

## Sheet: 1e
Supplementary file 1e. SIR of different types of cancers in patients with malignancies in the liver.
No.	Second primary tumor site	SEER Liver, non-Hispanic White (n = 33,670)
		Obs	Exp	SIR	95% CI
1	Oral Cavity and Pharynx	75	28	2.64*	(2.07-3.30)
2	Esophagus	18	13	1.41	(0.84-2.23)
3	Stomach	21	15	1.45	(0.90-2.21)
4	Small Intestine	11	4	2.50*	(1.25-4.48)
5	Colon and Rectum	71	82	0.86	(0.67-1.09)
6	Liver	/	/	/	/
7	Gallbladder	3	2	1.65	(0.34-4.83)
8	Pancreas	36	26	1.36	(0.95-1.89)
9	Larynx	11	9	1.21	(0.60-2.16)
10	Lung and Bronchus	244	130	1.88*	(1.65-2.13)
11	Bones and Joints	3	1	3.23	(0.67-9.43)
12	Soft Tissue including Heart	4	5	0.74	(0.20-1.91)
13	Melanoma of the Skin	48	51	0.94	(0.69-1.24)
14	Female Breast	50	55	0.91	(0.67-1.19)
15	Male Breast	1	2	0.61	(0.02-3.38)
16	Cervix Uteri	2	2	1.18	(0.14-4.26)
17	Ovary	4	6	0.73	(0.20-1.86)
18	Prostate	114	206	0.55*	(0.46-0.67)
19	Urinary system	115	96	1.2	(0.99-1.44)
20	Bladder	63	58	1.08	(0.83-1.39)
21	Kidney	50	33	1.51*	(1.12-1.99)
22	Renal Pelvis and Ureter	2	4	0.56	(0.07-2.01)
23	Brain	4	10	0.39	(0.11-1.00)
24	Endocrine System	24	13	1.87*	(1.20-2.79)
25	Thyroid	23	12	1.93*	(1.22-2.90)
26	Lymphoma	84	42	1.99*	(1.59-2.47)
27	Hodgkin Lymphoma	1	2	0.43	(0.01-2.39)
28	Non-Hodgkin Lymphoma	83	40	2.08*	(1.66-2.58)
29	Myeloma	16	13	1.2	(0.68-1.94)
30	Leukemia	30	27	1.13	(0.76-1.61)
Abbreviation: SIR, standard incidence ratio; Obs, observed; Exp, expected; CI, confidence interval.

## Sheet: 1f
Supplementary file 1f. SIR of different types of cancers in patients with primary gallbladder cancers.
No.	Second primary tumor site	SEER Gallbladder, non-Hispanic White (n = 11,290)
		Obs	Exp	SIR	95% CI
1	Oral Cavity and Pharynx	5	6.16	0.81	(0.26-1.90)
2	Esophagus	3	2.84	1.06	(0.22-3.09)
3	Stomach	21	5.69	3.69*	(2.29-5.64)
4	Small Intestine	10	1.52	6.57*	(3.15-12.09)
5	Colon excluding Rectum	50	25.66	1.95*	(1.45-2.57)
6	Rectum and Rectosigmoid Junction	12	7.96	1.51	(0.78-2.63)
7	Liver	9	4.5	2	(0.92-3.80)
8	Gallbladder	/	/	/	/
9	Pancreas	48	10.86	4.42*	(3.26-5.86)
10	Larynx	1	1.79	0.56	(0.01-3.11)
11	Lung and Bronchus	47	49.1	0.96	(0.70-1.27)
12	Bones and Joints	0	0.28	0	(0.00-13.23)
13	Soft Tissue including Heart	1	1.74	0.58	(0.01-3.21)
14	Melanoma of the Skin	3	11.56	0.26*	(0.05-0.76)
15	Female Breast	41	52.77	0.78	(0.56-1.05)
16	Male Breast	0	0.27	0	(0.00-13.65)
17	Cervix Uteri	4	1.69	2.36	(0.64-6.05)
18	Ovary	16	5.49	2.92*	(1.67-4.74)
19	Prostate	24	29.89	0.8	(0.51-1.19)
20	Urinary system	26	25.16	1.03	(0.67-1.51)
21	Bladder	16	15.1	1.06	(0.61-1.72)
22	Kidney	8	8.47	0.94	(0.41-1.86)
23	Renal Pelvis and Ureter	1	1.31	0.76	(0.02-4.25)
24	Brain	0	2.89	0	(0.00-1.28)
25	Endocrine System	7	4.83	1.45	(0.58-2.99)
26	Thyroid	7	4.52	1.55	(0.62-3.19)
27	Lymphoma	14	14.4	0.97	(0.53-1.63)
28	Hodgkin Lymphoma	0	0.65	0	(0.00-5.72)
29	Non-Hodgkin Lymphoma	14	13.76	1.02	(0.56-1.71)
30	Myeloma	8	5.04	1.59	(0.69-3.13)
31	Leukemia	10	8.85	1.13	(0.54-2.08)
Abbreviation: SIR, standard incidence ratio; Obs, observed; Exp, expected; CI, confidence interval.

## Sheet: 1g
Supplementary file 1g. SIR of different types of cancers in patients with primary pancreatic cancers.
No.	Second primary tumor site	SEER Pancreas, non-Hispanic White (n = 72,480)
		Obs	Exp	SIR	95% CI
1	Oral Cavity and Pharynx	30	31	0.95	(0.64-1.36)
2	Esophagus	15	15	1.01	(0.57-1.67)
3	Stomach	31	20	1.55*	(1.06-2.21)
4	Small Intestine	26	6	4.37*	(2.85-6.40)
5	Colon and Rectum	103	125	0.82*	(0.67-1.00)
6	Liver	14	19	0.75	(0.41-1.26)
7	Gallbladder	3	3	0.88	(0.18-2.56)
8	Pancreas	/	/	/	/
9	Larynx	6	10	0.6	(0.22-1.30)
10	Lung and Bronchus	256	197	1.30*	(1.15-1.47)
11	Bones and Joints	0	1	0	(0.00-3.00)
12	Soft Tissue including Heart	8	7	1.1	(0.47-2.16)
13	Melanoma of the Skin	59	64	0.92	(0.70-1.18)
14	Female Breast	110	146	0.75*	(0.62-0.91)
15	Male Breast	2	2	1.14	(0.14-4.12)
16	Cervix Uteri	4	4	0.93	(0.25-2.38)
17	Ovary	24	15	1.59*	(1.02-2.36)
18	Prostate	141	207	0.68*	(0.57-0.80)
19	Urinary system	116	124	0.94	(0.78-1.13)
20	Bladder	60	77	0.78	(0.59-1.00)
21	Kidney	45	40	1.13	(0.82-1.51)
22	Renal Pelvis and Ureter	7	5	1.28	(0.52-2.65)
23	Brain	11	13	0.82	(0.41-1.47)
24	Endocrine System	44	18	2.38*	(1.73-3.20)
25	Thyroid	43	17	2.48*	(1.80-3.35)
26	Lymphoma	50	60	0.83	(0.61-1.09)
27	Hodgkin Lymphoma	1	3	0.33	(0.01-1.86)
28	Non-Hodgkin Lymphoma	49	57	0.85	(0.63-1.13)
29	Myeloma	10	19	0.53*	(0.26-0.98)
30	Leukemia	23	38	0.61*	(0.38-0.91)
Abbreviation: SIR, standard incidence ratio; Obs, observed; Exp, expected; CI, confidence interval.

## Sheet: 1h
Supplementary file 1h. MR analysis with results concordant with the SEER SIR analysis in lung cancer.
No.	Second primary tumor site	SEER Non-Hispanic White Lung (n = 405,529)
		Obs	Exp	SIR	95% CI
1	Oral Cavity and Pharynx	592	319	1.85*	(1.71-2.01)
2	Esophagus	348	158	2.21*	(1.98-2.45)
3	Stomach	325	219	1.49*	(1.33-1.66)
4	Small Intestine	115	64	1.78*	(1.47-2.14)
5	Colon and Rectum	1657	1388	1.19*	(1.14-1.25)
6	Liver	209	186	1.12	(0.98-1.29)
7	Gallbladder	31	39	0.79	(0.53-1.12)
8	Pancreas	594	438	1.36*	(1.25-1.47)
9	Larynx	372	106	3.52*	(3.17-3.90)
10	Lung and Bronchus	/	/	/	/
11	Bones and Joints	13	13	1.01	(0.54-1.74)
12	Soft Tissue including Heart	105	78	1.34*	(1.10-1.62)
13	Melanoma of the Skin	587	679	0.86*	(0.80-0.94)
14	Female Breast	1517	1693	0.90*	(0.85-0.94)
15	Male Breast	22	18	1.2	(0.75-1.82)
16	Cervix Uteri	46	46	1	(0.73-1.34)
17	Ovary	158	176	0.9	(0.76-1.05)
18	Prostate	1607	2157	0.75*	(0.71-0.78)
19	Urinary system	2271	1353	1.68*	(1.61-1.75)
20	Bladder	1471	861	1.71*	(1.62-1.80)
21	Kidney	669	417	1.60*	(1.48-1.73)
22	Renal Pelvis and Ureter	112	62	1.80*	(1.48-2.16)
23	Brain	126	143	0.88	(0.73-1.05)
24	Endocrine System	382	186	2.05*	(1.85-2.27)
25	Thyroid	364	174	2.10*	(1.89-2.32)
26	Lymphoma	735	664	1.11*	(1.03-1.19)
27	Hodgkin Lymphoma	30	31	0.97	(0.66-1.39)
28	Non-Hodgkin Lymphoma	705	633	1.11*	(1.03-1.20)
29	Myeloma	136	207	0.66*	(0.55-0.78)
30	Leukemia	562	418	1.34*	(1.24-1.46)
Abbreviation: SIR, standard incidence ratio; Obs, observed; Exp, expected; CI, confidence interval.

## Sheet: 1i
Supplementary file 1i. SIR of different types of cancers in patients with primary melanomas.
No.	Second primary tumor site	SEER Non-Hispanic White Melanoma (n = 205,666)
		Obs	Exp	SIR	95% CI
1	Oral Cavity and Pharynx	486	452	1.08	(0.98-1.18)
2	Esophagus	191	211	0.91	(0.78-1.05)
3	Stomach	248	273	0.91	(0.80-1.03)
4	Small Intestine	99	81	1.22	(0.99-1.48)
5	Colon and Rectum	1518	1609	0.94*	(0.90-0.99)
6	Liver	170	269	0.63*	(0.54-0.73)
7	Gallbladder	17	41	0.42*	(0.24-0.67)
8	Pancreas	513	512	1	(0.92-1.09)
9	Larynx	97	145	0.67*	(0.54-0.82)
10	Lung and Bronchus	2142	2500	0.86*	(0.82-0.89)
11	Bones and Joints	18	18	0.98	(0.58-1.55)
12	Soft Tissue including Heart	234	106	2.22*	(1.94-2.52)
13	Melanoma of the Skin	/	/	/	/
14	Female Breast	1990	1694	1.17*	(1.12-1.23)
15	Male Breast	27	27	0.99	(0.65-1.44)
16	Cervix Uteri	37	69	0.54*	(0.38-0.74)
17	Ovary	163	167	0.98	(0.83-1.14)
18	Prostate	3926	2988	1.31*	(1.27-1.36)
19	Urinary system	1916	1765	1.09*	(1.04-1.14)
20	Bladder	1076	1114	0.97	(0.91-1.03)
21	Kidney	768	561	1.37*	(1.27-1.47)
22	Renal Pelvis and Ureter	53	72	0.74*	(0.55-0.96)
23	Brain	254	187	1.36*	(1.19-1.53)
24	Endocrine System	622	300	2.07*	(1.91-2.24)
25	Thyroid	599	284	2.11*	(1.94-2.29)
26	Lymphoma	1104	818	1.35*	(1.27-1.43)
27	Hodgkin Lymphoma	52	47	1.11	(0.83-1.46)
28	Non-Hodgkin Lymphoma	1052	772	1.36*	(1.28-1.45)
29	Myeloma	322	253	1.27*	(1.14-1.42)
30	Leukemia	683	520	1.31*	(1.22-1.42)
Abbreviation: SIR, standard incidence ratio; Obs, observed; Exp, expected; CI, confidence interval.

## Sheet: 1j
Supplementary file 1j. SIR of different types of cancers in female patients with primary breast cancers.
No.	Second primary tumor site	SEER Non-Hispanic White Female Breast (n = 560,230)					SEER Non-Hispanic White Male Breast (n = 5,587)
		Obs	Exp	SIR	95% CI		Obs	Exp	SIR	95% CI
1	Oral Cavity and Pharynx	888	723	1.23*	(1.15-1.31)		13	16.73	0.78	(0.41-1.33)
2	Esophagus	279	235	1.19*	(1.05-1.34)		8	9.13	0.88	(0.38-1.73)
3	Stomach	552	546	1.01	(0.93-1.10)		17	11.85	1.43	(0.84-2.30)
4	Small Intestine	234	213	1.1	(0.96-1.25)		5	2.92	1.71	(0.56-4.00)
5	Colon and Rectum	4633	4507	1.03	(1.00-1.06)		57	57	1	(0.65-2.69)
6	Liver	246	381	0.65*	(0.57-0.73)		11	11.73	0.94	(0.47-1.68)
7	Gallbladder	135	182	0.74*	(0.62-0.88)		2	1.09	1.83	(0.22-6.61)
8	Pancreas	1561	1474	1.06*	(1.01-1.11)		27	17.82	1.51	(1.00-2.20)
9	Larynx	137	138	0.99	(0.83-1.17)		8	6.74	1.19	(0.51-2.34)
10	Lung and Bronchus	7732	6954	1.11*	(1.09-1.14)		92	91.59	1	(0.81-1.23)
11	Bones and Joints	52	44	1.18	(0.88-1.55)		0	0.54	0	(0.00-6.78)
12	Soft Tissue including Heart	401	238	1.68*	(1.52-1.85)		3	3.58	0.84	(0.17-2.45)
13	Melanoma of the Skin	2342	1774	1.32*	(1.27-1.37)		36	31.03	1.16	(0.81-1.61)
14	Female Breast	/	/	/	/		/	/	/	/
15	Male Breast	/	/	/	/		/	/	/	/
16	Cervix Uteri	276	415	0.66*	(0.59-0.75)		/	/	/	/
17	Ovary	1413	1317	1.07*	(1.02-1.13)		/	/	/	/
18	Prostate	/	/	/	/		211	161.81	1.30*	(1.13-1.49)
19	Urinary system	2843	2547	1.12*	(1.08-1.16)		79	72.7	1.09	(0.86-1.35)
20	Bladder	1355	1267	1.07*	(1.01-1.13)		49	48.44	1.01	(0.75-1.34)
21	Kidney	1296	1098	1.18*	(1.12-1.25)		26	20.77	1.25	(0.82-1.83)
22	Renal Pelvis and Ureter	161	158	1.02	(0.87-1.19)		3	2.71	1.11	(0.23-3.24)
23	Brain	385	461	0.83*	(0.75-0.92)		5	5.71	0.88	(0.28-2.04)
24	Endocrine System	1646	1140	1.44*	(1.38-1.52)		12	4.82	2.49*	(1.29-4.35)
25	Thyroid	1587	1095	1.45*	(1.38-1.52)		10	4.29	2.33*	(1.12-4.29)
26	Lymphoma	1983	2112	0.94*	(0.90-0.98)		30	26.87	1.12	(0.75-1.59)
27	Hodgkin Lymphoma	79	103	0.77*	(0.61-0.95)		3	1.31	2.3	(0.47-6.71)
28	Non-Hodgkin Lymphoma	1904	2009	0.95*	(0.91-0.99)		27	25.56	1.06	(0.70-1.54)
29	Myeloma	538	596	0.90*	(0.83-0.98)		9	10.33	0.87	(0.40-1.65)
30	Leukemia	1569	1173	1.34*	(1.27-1.41)		22	18.71	1.18	(0.74-1.78)
Abbreviation: SIR, standard incidence ratio; Obs, observed; Exp, expected; CI, confidence interval.

[truncated: 7 more sheets: 1k, 1l, 1m, 1n, 1o, 1p, 1q]
