# Supplementary material for: Risk of second primary cancers after a diagnosis of first primary cancer: A pan-cancer analysis and Mendelian randomization study
Source: eLife. 2023 Nov 2;12:e86379. doi: 10.7554/eLife.86379 (PMC10622143; doi:10.7554/eLife.86379)
Supplement: Supplementary file 2. [file elife-86379-supp2.xlsx]

## Sheet: 2a
Supplementary file 2a. Included SNPs in the mendelian randomization analyses.
Cancer type	SNP	CHR	BP	EAF	Effect_allel	Other_allel	BETA	SE	P
Oral	rs6547741	2	27855924	0.46	G	A	0.18633	0.0339263	3.97e-08
Oral	rs10462706	5	1343794	0.85	C	T	0.301105	0.0485419	5.54e-10
Oral	rs8181047	9	22064465	0.24	A	G	0.215111	0.0365049	3.8e-09
Oral	rs928674	9	133952024	0.12	G	A	0.285179	0.050885	2.09e-08
Oral	rs1453414	11	5829084	0.2	C	A	0.173953	0.0318636	4.78e-08
Esophageal	rs7255	2	20878820	0.48	T	C	0.131028	0.02	9.1e-11
Esophageal	rs2687202	3	70929983	0.33	T	C	0.122218	0.02	2.3e-09
Esophageal	rs17451754	7	117256712	0.86	G	A	0.173953	0.027	4.8e-10
Esophageal	rs7852462	9	100310501	0.68	C	T	0.113329	0.019	1.5e-08
Esophageal	rs2464469	15	58362025	0.42	G	A	0.113329	0.0177	4.6e-10
Colon and rectum	rs6983267	8	128413305	0.5	G	T	0.116534	0.0154125	4e-14
Colon and rectum	rs16892766	8	117630683	0.1	C	A	0.18633	0.0267035	3e-12
Colon and rectum	rs3802842	11	111171709	0.28	C	A	0.116534	0.0180199	1e-10
Colon and rectum	rs73208120	12	117747590	0.11	G	T	0.14842	0.0267837	3e-08
Colon and rectum	rs4444235	14	54410919	0.49	C	T	0.0833816	0.0152957	5e-08
Colon and rectum	rs4779584	15	32994756	0.81	T	C	0.113329	0.0197756	1e-08
Colon and rectum	rs4939827	18	46453463	0.54	T	C	0.122218	0.01539	2e-15
Colon and rectum	rs6066825	20	47340117	0.64	A	G	0.0861777	0.0146456	4e-09
Pancreas	rs3790844	1	200007432	0.77	A	G	0.210721	0.0329622	8e-16
Pancreas	rs13303010	1	894573	0.11	G	A	0.231112	0.0321815	8e-14
Pancreas	rs1486134	2	67639769	0.28	G	T	0.122218	0.0180679	5e-09
Pancreas	rs9854771	3	189508471	0.64	G	A	0.105361	0.0229977	5e-08
Pancreas	rs401681	5	1322087	0.44	T	C	0.173953	0.0171562	9e-17
Pancreas	rs6971499	7	130680521	0.84	T	C	0.210721	0.0351709	7e-14
Pancreas	rs17688601	7	40866663	0.73	C	A	0.127833	0.0247429	1e-08
Pancreas	rs505922	9	136149229	0.11	C	T	0.103804	0.00931565	7e-27
Pancreas	rs9543325	13	73916628	0.37	C	T	0.215111	0.0185987	1e-22
Pancreas	rs9581943	13	28493997	0.39	A	G	0.139762	0.0154655	5e-14
Pancreas	rs7190458	16	75263661	0.04	A	G	0.307485	0.0320475	1e-11
Pancreas	rs7214041	17	70401476	0.11	T	C	0.223144	0.0225538	9e-15
Pancreas	rs4795218	17	36078510	0.77	G	A	0.127833	0.0223917	1e-08
Pancreas	rs16986825	22	29300306	0.15	T	C	0.139762	0.0221968	1e-08
Melanoma	rs7412746	1	150860471	0.47	T	C	0.139762	0.0215587	9e-11
Melanoma	rs13016963	2	202162811	0.38	A	G	0.131028	0.0213882	9e-10
Melanoma	rs6750047	2	38276549	0.28	A	G	0.0953102	0.0164585	7e-09
Melanoma	rs62389423	6	421281	0.14	A	G	0.215111	0.0288554	9e-14
Melanoma	rs6914598	6	21163919	0.31	C	T	0.0953102	0.017358	4e-08
Melanoma	rs1636744	7	16984280	0.41	T	C	0.0953102	0.0164585	7e-09
Melanoma	rs7023329	9	21816528	0.5	A	G	0.150823	0.0260447	7e-09
Melanoma	rs2995264	10	105668843	0.1	G	A	0.157004	0.0261769	2e-09
Melanoma	rs1393350	11	89011046	0.27	A	G	0.157004	0.0216391	4e-13
Melanoma	rs498136	11	69367118	0.36	A	C	0.113329	0.0161104	2e-12
Melanoma	rs1801516	11	108175462	0.86	G	A	0.127833	0.0215512	3e-09
Melanoma	rs4778138	15	28335820	0.85	A	G	0.174353	0.0259995	2e-11
Melanoma	rs1805007	16	89986117	0.07	T	C	0.405465	0.0318498	4e-37
Melanoma	rs16953002	16	54114824	0.17	A	G	0.14842	0.0213949	4e-12
Melanoma	rs6059655	20	32665748	0.07	A	G	0.322083	0.0325941	5e-23
Melanoma	rs45430	21	42746081	0.66	T	C	0.116534	0.0210295	3e-08
Melanoma	rs2284063	22	38544298	0.64	A	G	0.18633	0.0310663	2e-09
Lung	rs380286	5	1320132	0.577369	G	A	0.141287	0.0110451	2e-32
Lung	rs501942	6	31872700	0.0986421	T	C	0.16986	0.019183	8e-19
Lung	rs11780471	8	27487202	0.940381	G	A	0.141138	0.0243138	2e-08
Lung	rs1629083	11	118255861	0.497561	C	T	0.0670168	0.011772	1e-08
Lung	rs28408315	15	78892838	0.723971	G	A	0.0918389	0.0139181	4e-12
Lung	rs77468143	15	49084427	0.746124	T	G	0.0826635	0.0140459	1e-09
Lung	rs56113850	19	40847202	0.559578	C	T	0.122793	0.0135484	5e-19
Female Breast	rs2506889	1	10535965	0.3185	T	C	0.0615	0.00663979	2e-20
Female Breast	rs2992756	1	18480845	0.49	T	C	0.0582689	0.00733741	2e-15
Female Breast	rs4233486	1	40914768	0.64	T	C	0.0304592	0.00529856	9e-09
Female Breast	rs17426269	1	87691240	0.15	A	G	0.0487902	0.0086939	2e-08
Female Breast	rs11583393	1	87963341	0.249	A	C	0.0396	0.007212	4e-08
Female Breast	rs1230666	1	113630788	0.8721	G	A	0.0592	0.0094659	4e-10
Female Breast	rs11249433	1	121538815	0.41	G	A	0.10436	0.00684899	2e-52
Female Breast	rs11205303	1	149934520	0.3998	C	T	0.0497	0.00642181	1e-14
Female Breast	rs4971059	1	155176305	0.35	A	G	0.0487902	0.00742515	5e-11
Female Breast	rs35383942	1	201468704	0.06	T	C	0.113329	0.0156196	4e-13
Female Breast	rs11117758	1	217047232	0.79	G	A	0.0512933	0.00871714	4e-09
Female Breast	rs72755295	1	241870961	0.03	G	A	0.139762	0.018268	2e-14
Female Breast	rs11684853	2	19111157	0.5606	T	G	0.0442	0.00619872	1e-12
Female Breast	rs6725517	2	24906604	0.59	A	G	0.040822	0.00585034	3e-12
Female Breast	rs4848599	2	120481784	0.8845	C	T	0.0933	0.010073	2e-20
Female Breast	rs2016394	2	172108243	0.53	G	A	0.0512933	0.0074558	6e-12
Female Breast	rs3769821	2	201258707	0.6683	T	C	0.0565	0.00651012	4e-18
Female Breast	rs4442975	2	217056046	0.5	G	T	0.116534	0.00561344	1e-95
Female Breast	rs6436017	2	217858732	0.5042	G	A	0.0399	0.00633456	3e-10
Female Breast	rs12479355	2	226362236	0.79	A	G	0.040822	0.00727406	2e-08
Female Breast	rs6762644	3	4700592	0.38	G	A	0.0487902	0.00562177	4e-18
Female Breast	rs4973768	3	27374522	0.47	T	C	0.10436	0.00655741	5e-57
Female Breast	rs17838698	3	30643415	0.2978	T	C	0.0517	0.00675762	2e-14
Female Breast	rs56387622	3	46846708	0.1012	C	T	0.0942	0.0105697	5e-19
Female Breast	rs3821902	3	63956021	0.1358	G	T	0.0623	0.00892841	3e-12
Female Breast	rs13066793	3	86988393	0.91	A	G	0.0618754	0.0101279	1e-09
Female Breast	rs9833888	3	100004736	0.22	T	G	0.0582689	0.00936934	5e-10
Female Breast	rs6776003	3	141547651	0.4178	A	G	0.0394	0.00625518	3e-10
Female Breast	rs58058861	3	172567447	0.21	A	G	0.0582689	0.00915985	2e-10
Female Breast	rs6815814	4	38814717	0.26	C	A	0.0582689	0.00809236	6e-13
Female Breast	rs10022462	4	88322666	0.44	T	C	0.0392207	0.00653918	2e-09
Female Breast	rs62331150	4	105147856	0.2263	T	G	0.0494	0.00736651	2e-11
Female Breast	rs77528541	4	125922349	0.87	G	T	0.0512933	0.00839579	1e-09
Female Breast	rs7697216	4	174906885	0.8819	C	T	0.1039	0.00976759	2e-26
Female Breast	rs2853669	5	1295234	0.3061	G	A	0.0651	0.00690159	4e-21
Female Breast	rs4702131	5	16233510	0.5612	C	T	0.0424	0.00622934	1e-11
Female Breast	rs12519859	5	32581080	0.4748	A	G	0.0365	0.00627497	6e-09
Female Breast	rs10941679	5	44706396	0.25	G	A	0.139762	0.00773657	6e-73
Female Breast	rs62355901	5	56757708	0.1602	C	T	0.1734	0.00824257	3e-98
Female Breast	rs1353747	5	59041654	0.91	T	G	0.040822	0.00693757	4e-09
Female Breast	rs332529	5	91493653	0.1605	A	G	0.0606	0.00888348	9e-12
Female Breast	rs6882649	5	111882089	0.66	T	G	0.0304592	0.00517644	4e-09
Female Breast	rs6596100	5	133071366	0.75	C	T	0.0618754	0.0107265	8e-09
Female Breast	rs11135046	5	158803005	0.5529	T	G	0.0717	0.00618987	5e-31
Female Breast	rs4562056	5	170164483	0.33	T	G	0.0487902	0.00784521	5e-10
Female Breast	rs71557345	6	26680470	0.93	G	A	0.0833816	0.0133325	4e-10
Female Breast	rs12207986	6	80384570	0.53	A	G	0.0304592	0.00507839	2e-09
Female Breast	rs9361840	6	81545215	0.2368	G	A	0.0541	0.00722502	7e-14
Female Breast	rs60954078	6	151634779	0.07	G	A	0.1817	0.0117155	3e-54
Female Breast	rs7971	7	21901342	0.65	A	G	0.040822	0.00727406	2e-08
Female Breast	rs17156577	7	28317270	0.11	C	T	0.0487902	0.00829173	4e-09
Female Breast	rs17268829	7	94484487	0.28	C	T	0.0487902	0.00675268	5e-13
Female Breast	rs71559437	7	101909160	0.88	G	A	0.0725706	0.010509	5e-12
Female Breast	rs11977670	7	140242504	0.43	A	G	0.0582689	0.00701631	1e-16
Female Breast	rs720475	7	144377836	0.75	G	A	0.040822	0.0059975	1e-11
Female Breast	rs9693444	8	29652100	0.32	A	C	0.0582689	0.00613033	2e-21
Female Breast	rs6472903	8	75318066	0.83	T	G	0.0618754	0.00655973	4e-21
Female Breast	rs13267382	8	116197325	0.36	A	G	0.0295588	0.0044078	2e-11
Female Breast	rs10096351	8	127359926	0.5441	G	A	0.1055	0.00622502	2e-64
Female Breast	rs1011970	9	22062135	0.16	T	G	0.0676586	0.00842903	1e-15
Female Breast	rs10816625	9	108074792	0.06	G	A	0.10436	0.01206	5e-18
Female Breast	rs630965	9	108123199	0.6196	T	C	0.0992	0.00639615	3e-54
Female Breast	rs10760444	9	126634155	0.43	G	A	0.0295588	0.00514194	9e-09
Female Breast	rs72810771	10	22108073	0.0187	T	C	0.2026	0.022478	2e-19
Female Breast	rs10995201	10	62540131	0.84	A	G	0.105361	0.00698396	2e-51
Female Breast	rs1268974	10	79092621	0.6132	G	A	0.0793	0.00631897	4e-36
Female Breast	rs7904519	10	113014168	0.46	G	A	0.0295588	0.00402226	2e-13
Female Breast	rs12250948	10	113368732	0.7844	C	T	0.0576	0.00744258	1e-14
Female Breast	rs11199914	10	121334387	0.68	C	T	0.040822	0.00595277	7e-12
Female Breast	rs2981578	10	121580797	0.47	C	T	0.207014	0.00618355	1e-245
Female Breast	rs6597981	11	803017	0.52	G	A	0.040822	0.00572498	1e-12
Female Breast	rs1973765	11	1877434	0.4001	C	T	0.0817	0.00636375	1e-37
Female Breast	rs78540526	11	69516650	0.0756	T	C	0.2758	0.0113062	2e-131
Female Breast	rs11822830	11	129591121	0.5959	G	A	0.0483	0.00631321	2e-14
Female Breast	rs7297051	12	28021884	0.76	C	T	0.116534	0.0071176	3e-60
Female Breast	rs17356907	12	95633983	0.7	A	G	0.0943106	0.00715008	1e-39
Female Breast	rs1292011	12	115398717	0.58	A	G	0.0833816	0.0063722	4e-39
Female Breast	rs6562760	13	73383544	0.76	G	A	0.0512933	0.00855201	2e-09
Female Breast	rs7149262	14	36667340	0.2113	A	C	0.0724	0.00761702	2e-21
Female Breast	rs848087	14	36808438	0.5682	G	A	0.0427	0.00652532	6e-11
Female Breast	rs11624333	14	68513118	0.2595	C	T	0.0968	0.00713912	7e-42
Female Breast	rs941764	14	91374725	0.35	G	A	0.0295588	0.00412766	8e-13
Female Breast	rs11627032	14	92637727	0.75	T	C	0.040822	0.00618134	4e-11
Female Breast	rs2290203	15	90968837	0.79	G	A	0.0618754	0.0100693	8e-10
Female Breast	rs4784227	16	52565276	0.24	T	C	0.207014	0.00684564	7e-201
Female Breast	rs28539243	16	54648152	0.49	A	G	0.0487902	0.00629336	9e-15
Female Breast	rs2432539	16	56387075	0.4	A	G	0.0295588	0.00538328	4e-08
Female Breast	rs7500067	16	80614399	0.2293	G	A	0.0785	0.00727782	4e-27
Female Breast	rs4496150	16	87051631	0.75	C	A	0.040822	0.00707677	8e-09
Female Breast	rs7223535	17	30884649	0.268	A	G	0.0439	0.00701948	4e-10
Female Breast	rs2787486	17	55132413	0.7	A	C	0.0725706	0.00649941	6e-29
Female Breast	rs745570	17	79807926	0.5	A	G	0.0295588	0.00472636	4e-10
Female Breast	rs7240205	18	26576054	0.6096	T	C	0.0365	0.00650392	2e-08
Female Breast	rs1436904	18	26990703	0.6	T	G	0.0512933	0.00662768	1e-14
Female Breast	rs9952980	18	45308832	0.3504	C	T	0.0478	0.00650447	2e-13
Female Breast	rs7258465	19	18422832	0.3436	C	T	0.0725	0.00657787	3e-28
Female Breast	rs2965183	19	19434887	0.35	A	G	0.0392207	0.00570098	6e-12
Female Breast	rs1685191	19	43779080	0.5647	T	C	0.0586	0.00637784	4e-20
Female Breast	rs16991615	20	5967581	0.06	A	G	0.0953102	0.0158908	2e-09
Female Breast	rs6122906	20	50329374	0.18	G	A	0.0487902	0.00774597	3e-10
Female Breast	rs2403907	21	15202135	0.3159	A	C	0.0796	0.00671382	2e-32
Female Breast	rs132289	22	29155884	0.9822	G	A	0.2482	0.0241763	1e-24
Female Breast	rs6001982	22	40623944	0.1066	A	C	0.1207	0.00981939	1e-34
Female Breast	rs28512361	22	45887417	0.11	A	G	0.0487902	0.0086939	2e-08
Ovary	rs3820282	1	22141722	0.15	C	T	0.10436	0.0185959	2e-08
Ovary	rs2072590	2	176177905	0.68	A	C	0.131028	0.0175763	9e-14
Ovary	rs7651446	3	156689208	0.05	A	C	0.463734	0.030888	6e-51
Ovary	rs10069690	5	1279675	0.26	A	G	0.131028	0.0227932	9e-09
Ovary	rs10088218	8	128531703	0.87	G	A	0.261365	0.0279952	1e-20
Ovary	rs11782652	8	81741409	0.07	G	A	0.207014	0.0328658	3e-10
Ovary	rs3814113	9	16915023	0.68	A	G	0.235722	0.015863	6e-50
Ovary	rs9303542	17	48334138	0.27	G	A	0.131028	0.0167407	5e-15
Ovary	rs8170	19	17278895	0.19	A	G	0.165514	0.0219751	5e-14
Prostate	rs4245739	1	204549714	0.74	A	C	0.0953102	0.00927746	3e-24
Prostate	rs17599629	1	150685811	0.22	G	A	0.0676586	0.00953764	1e-11
Prostate	rs1218582	1	154861707	0.45	G	A	0.0487902	0.00732401	1e-08
Prostate	rs12621278	2	172446825	0.94	A	G	0.239017	0.0180147	2e-42
Prostate	rs721048	2	62904596	0.18	A	G	0.0953102	0.00927746	5e-22
Prostate	rs9306895	2	20678393	0.36	C	T	0.076961	0.0094493	3e-21
Prostate	rs10187424	2	85567174	0.57	T	C	0.076961	0.00711959	1e-20
Prostate	rs1465618	2	43326810	0.21	T	C	0.0861777	0.00936259	2e-18
Prostate	rs9287719	2	10570604	0.47	C	T	0.0676586	0.00953764	6e-17
Prostate	rs3771570	2	241443449	0.15	T	C	0.0861777	0.0117579	1e-14
Prostate	rs11691517	2	111135519	0.74	T	G	0.0676586	0.00718645	4e-12
Prostate	rs74702681	2	66425753	0.02	T	C	0.157004	0.0261873	2e-09
Prostate	rs34925593	2	173369819	0.48	C	T	0.0487902	0.00971935	3e-08
Prostate	rs10936632	3	170412314	0.51	A	C	0.0953102	0.00927746	3e-34
Prostate	rs10934853	3	128319530	0.28	A	C	0.0953102	0.00692627	1e-29
Prostate	rs7611694	3	113556777	0.58	A	C	0.0861777	0.00705396	5e-25
Prostate	rs2660753	3	87061524	0.1	T	C	0.122218	0.0135484	6e-21
Prostate	rs182314334	3	152286413	0.9	T	C	0.0861777	0.0140459	4e-11
Prostate	rs7679673	4	105140377	0.59	C	A	0.122218	0.0090311	1e-49
Prostate	rs17021918	4	94641726	0.65	C	T	0.0861777	0.00936259	1e-24
Prostate	rs1894292	4	73483441	0.52	G	A	0.0582689	0.00718645	5e-15
Prostate	rs2242652	5	1279913	0.79	G	A	0.157004	0.010857	4e-52
Prostate	rs4976790	5	178541914	0.11	T	G	0.076961	0.0118674	7e-09
Prostate	rs2121875	5	44365443	0.33	C	A	0.0487902	0.00971935	1e-08
Prostate	rs9364554	6	160412632	0.28	T	C	0.10436	0.00919386	5e-33
Prostate	rs1933488	6	153119944	0.58	A	G	0.076961	0.0094493	4e-21
Prostate	rs4713266	6	11218797	0.52	C	T	0.0487902	0.00725458	1e-10
Prostate	rs2273669	6	108963986	0.15	G	A	0.0676586	0.0118674	3e-10
Prostate	rs4711748	6	43726861	0.23	T	C	0.0487902	0.00971935	3e-08
Prostate	rs10486567	7	27936944	0.76	G	A	0.131028	0.00895187	2e-45
Prostate	rs6465657	7	98187015	0.46	C	T	0.10436	0.00692627	7e-37
Prostate	rs17621345	7	40835593	0.74	A	C	0.0676586	0.00953764	7e-14
Prostate	rs56232506	7	47397647	0.45	A	G	0.0582689	0.00725458	1e-11
Prostate	rs1447295	8	127472793	0.11	A	C	0.34359	0.0126225	1e-179
Prostate	rs11135910	8	26034626	0.15	T	C	0.076961	0.0094493	9e-13
Prostate	rs2928679	8	23581462	0.44	A	G	0.0487902	0.00725458	2e-11
Prostate	rs1048169	9	19055967	0.38	C	T	0.0582689	0.00718645	7e-14
Prostate	rs1182	9	129813781	0.22	A	C	0.0582689	0.00962763	1e-09
Prostate	rs10993994	10	46046326	0.38	T	C	0.207014	0.00829673	2e-147
Prostate	rs1935581	10	88435392	0.63	C	T	0.0487902	0.00971935	7e-09
Prostate	rs7931342	11	69227030	0.5	G	T	0.157004	0.00872229	1e-86
Prostate	rs11568818	11	102530930	0.55	T	C	0.076961	0.00711959	2e-19
Prostate	rs11214775	11	113936459	0.71	G	A	0.0676586	0.00953764	4e-15
Prostate	rs1881502	11	1486282	0.19	T	C	0.0582689	0.00962763	7e-09
Prostate	rs878987	11	134396478	0.15	G	A	0.0676586	0.0119788	5e-08
Prostate	rs902774	12	52880120	0.15	A	G	0.122218	0.0112398	2e-31
Prostate	rs1270884	12	114247766	0.48	A	G	0.0676586	0.00711959	1e-18
Prostate	rs10845938	12	14263984	0.55	G	A	0.0582689	0.00962763	1e-12
Prostate	rs7968403	12	64619044	0.64	T	C	0.0582689	0.00962763	3e-12
Prostate	rs80130819	12	48025835	0.91	A	C	0.0953102	0.0139181	2e-11
Prostate	rs7295014	12	132491403	0.35	G	A	0.0487902	0.00725458	1e-09
Prostate	rs8008270	14	52905612	0.81	C	T	0.0861777	0.00936259	6e-16
Prostate	rs7141529	14	68660027	0.5	C	T	0.0487902	0.00725458	2e-10
Prostate	rs1004030	14	22836440	0.58	T	C	0.0487902	0.00732401	2e-08
Prostate	rs33984059	15	56093670	0.98	A	G	0.173953	0.0320633	1e-08
Prostate	rs11863709	16	57620664	0.96	C	T	0.14842	0.0220052	2e-11
Prostate	rs1859962	17	71112612	0.48	G	T	0.157004	0.0065136	1e-91
Prostate	rs684232	17	715725	0.35	C	T	0.0861777	0.00705396	4e-24
Prostate	rs28441558	17	7899800	0.05	C	T	0.14842	0.0176002	1e-16
Prostate	rs11650494	17	49267824	0.08	A	G	0.0953102	0.0161657	9e-12
Prostate	rs142444269	17	31771730	0.78	C	T	0.0676586	0.00953764	3e-10
Prostate	rs2680708	17	58378759	0.61	G	A	0.0487902	0.00732401	2e-08
Prostate	rs7241993	18	79013973	0.69	C	T	0.076961	0.0094493	2e-18
Prostate	rs12956892	18	59079083	0.3	T	G	0.0487902	0.00971935	8e-09
Prostate	rs10460109	18	75324210	0.42	T	C	0.0487902	0.00732401	4e-08
Prostate	rs2735839	19	50861367	0.85	G	A	0.165514	0.0129741	3e-47
Prostate	rs8102476	19	38244973	0.54	C	T	0.0861777	0.00698953	9e-30
Prostate	rs11666569	19	17103263	0.71	C	T	0.0487902	0.00971935	8e-09
Prostate	rs2427345	20	62440555	0.62	C	T	0.0487902	0.00732401	3e-08
Prostate	rs5759167	22	43104206	0.5	G	T	0.139762	0.0066264	6e-71
Prostate	rs58133635	22	40075184	0.2	T	C	0.0676586	0.00953764	5e-12
Prostate	rs9625483	22	28492951	0.03	A	G	0.131028	0.0245265	2e-08
Bladder	rs2204008	2	38045401	0.46	T	C	0.122218	0.0135484	3e-15
Bladder	rs401681	3	1321972	0.54	C	T	0.113329	0.0182293	4e-11
Bladder	rs1495741	4	18415371	0.8	A	G	0.131028	0.020239	2e-10
Bladder	rs710521	5	189928144	0.73	A	G	0.131028	0.020062	2e-11
Bladder	rs1014971	8	38936618	0.62	T	C	0.122218	0.0180679	1e-11
Bladder	rs798766	18	1732512	0.19	T	C	0.198851	0.0187506	7e-25
Bladder	rs9642880	22	127705823	0.45	T	G	0.215111	0.0164639	4e-38
Kidney	rs4381241	1	50441766	0.44	C	T	0.10436	0.0165683	3e-10
Kidney	rs12105918	2	144450626	0.06	C	T	0.223144	0.0379225	4e-09
Kidney	rs67311347	3	40491752	0.69	G	A	0.10436	0.0188327	3e-08
Kidney	rs10936602	3	169818849	0.73	T	C	0.10436	0.0181541	9e-09
Kidney	rs2241261	8	23019226	0.51	T	C	0.0953102	0.0163854	6e-09
Kidney	rs11813268	10	103922538	0.16	T	C	0.113329	0.0206395	4e-08
Kidney	rs74911261	11	108486410	0.02	A	G	0.34359	0.0540122	2e-10
Kidney	rs4903064	14	72812712	0.23	C	T	0.19062	0.0186898	2e-24
Thyroid	rs12129938	1	233276815	0.795	A	G	0.277632	0.0420394	4e-11
Thyroid	rs6793295	3	169800667	0.759	T	C	0.207014	0.0373575	3e-08
Thyroid	rs2466076	8	32575278	0.484	G	T	0.277632	0.0326864	2e-17
Thyroid	rs7902587	10	103934543	0.109	T	C	0.34359	0.0522893	5e-11
Thyroid	rs116909374	14	36269155	0.034	T	C	0.593327	0.071444	1e-16
Thyroid	rs56062135	15	67163292	0.253	T	C	0.215111	0.036789	5e-09
Myeloma	rs7577599	2	25390277	0.82	T	C	0.215111	0.0259021	1e-16
Myeloma	rs6599192	3	41950916	0.17	G	A	0.231112	0.0269171	9e-18
Myeloma	rs1423269	5	95920020	0.74	A	G	0.157004	0.0234123	2e-11
Myeloma	rs3132535	6	31148749	0.32	A	G	0.182322	0.0215853	3e-17
Myeloma	rs9372120	6	106219660	0.218	G	T	0.165514	0.0213494	9e-15
Myeloma	rs7781265	7	151253854	0.125	T	C	0.173953	0.0303545	1e-08
Myeloma	rs1948915	8	127210176	0.345	C	T	0.122218	0.0185064	4e-11
Myeloma	rs2811710	9	21991924	0.657	G	A	0.139762	0.0190183	2e-13
Myeloma	rs2790457	10	28567890	0.739	G	A	0.113329	0.020194	2e-08
Myeloma	rs7193541	16	74630845	0.585	T	C	0.122218	0.0176984	5e-12
Myeloma	rs34562254	17	16939677	0.11	A	G	0.262364	0.031186	4e-17
Myeloma	rs6066835	20	48738472	0.083	C	T	0.231112	0.0310596	1e-13
Myeloma	rs139402	22	39150140	0.43	C	T	0.207014	0.0196194	5e-26

## Sheet: 2b
Supplementary file 2b. Summary of the statistical power (%) in this study (European ancestry).
Outcome Exposure	Oral Cavity and pharynx	Esophagus	Colon and rectum	Pancreas	Melanoma	Lung	Female breast	Ovary	Prostate	Bladder	Kidney	Thyroid	Myeloma
Oral Cavity and Pharynx	NA	11	18	43	8	10	48	15	52	71	15	6	8
Esophagus	25	NA	12	40	7	9	45	14	48	66	14	6	7
Stomach	19	9	11	32	7	8	36	12	40	56	12	6	7
Small Intestine	10	6	7	14	6	6	16	7	17	23	7	5	7
Colon and Rectum	80	36	NA	97	17	28	99	52	99	>99	51	9	18
Liver	16	9	9	27	6	8	30	11	33	47	11	5	7
Gallbladder	11	7	7	16	6	6	18	8	19	27	8	5	6
Pancreas	24	11	12	NA	7	8	46	15	49	68	14	6	7
Larynx	10	7	7	15	6	6	16	8	18	25	7	5	6
Lung and Bronchus	59	24	28	86	12	NA	90	35	93	99	34	7	13
Bones and Joints	8	6	6	11	5	9	12	7	13	17	7	5	5
Soft Tissue including Heart	23	11	12	39	7	9	44	14	47	65	14	6	7
Melanoma of the Skin	59	24	28	86	NA	19	91	35	93	99	34	8	13
Female Breast	97	58	67	>99	28	47	NA	78	NA	>99	77	13	29
Male Breast	6	5	6	8	5	5	NA	NA	8	10	6	5	5
Cervix Uteri	12	7	8	18	6	7	20	8	NA	31	8	5	6
Ovary	27	12	14	46	8	10	52	NA	NA	75	16	6	8
Prostate	93	52	61	>99	25	42	NA	NA	NA	>99	70	12	26
Bladder	47	19	22	75	10	16	81	28	84	NA	34	8	11
Kidney	30	13	15	52	8	11	58	18	62	81	NA	7	8
Renal Pelvis and Ureter	9	6	7	13	6	6	15	7	16	22	27	6	6
Brain	18	9	10	30	7	8	34	12	37	52	7	6	7
Thyroid	14	8	8	22	6	7	25	9	27	39	9	NA	6
Hodgkin Lymphoma	11	7	7	16	6	6	18	8	19	27	8	5	6
Non-Hodgkin Lymphoma	44	18	21	71	10	15	77	26	81	94	25	7	10
Myeloma	19	9	11	33	7	8	37	12	40	56	12	6	NA
Leukemia	32	14	16	55	8	12	61	19	65	83	18	6	9
Note: statistical power≥80 was bolded

## Sheet: 2c
Supplementary table file 2c. Summary of MR analyses and interpretation of causality
No.	Diseases	Cases	Controls	Proportion	Sample size	MR concordant with SEER SIR				MR nonconcordant with SEER SIR
						Positive Causality	Negative Causality	No Causality		Positive Causality	Negative Causality
1	Oral Cavity and Pharynx	1875	457281	0.00408358	459156	Non-hodgkin Lymphoma	-	Female breast, Prostate		-	Myeloma
2	Esophagus	1681	457475	0.00366107	459156	-	-	-		-	Myeloma
3	Stomach	1318	457838	0.00287048	459156	NA	NA	NA		NA	NA
4	Small Intestine	448	458708	0.000975703	459156	NA	NA	NA		NA	NA
5	Colon and Rectum	9029	450127	0.0196643	459156	-	-	-		Liver	-
6	Liver	1057	458099	0.00230205	459156	NA	NA	NA		NA	NA
7	Gallbladder	538	458618	0.00117172	459156	NA	NA	NA		NA	NA
8	Pancreas	1735	457421	0.00377867	459156	Intestin	-	Melanoma		Larynx, Gallbladder	-
9	Larynx	480	458676	0.0010454	459156	NA	NA	NA		NA	NA
10	Lung and Bronchus	5439	453717	0.0118456	459156	-	Female breast	-		Non-hodgkin	Bone and joints
11	Bones and Joints	302	458854	0.000657729	459156	NA	NA	NA		NA	NA
12	Soft Tissue including Heart	1649	457507	0.00359137	459156	NA	NA	NA		NA	NA
13	Melanoma of the Skin	5495	453661	0.0119676	459156	Female breast	-	Colon and Rectum		-	-
14	Female Breast	17989	231338	0.0721502	249327	-	-	-		Liver	-
15	Male Breast	137	209692	0.000652913	209829	NA	NA	NA		NA	NA
16	Cervix Uteri	633	248694	0.00253883	249327	NA	NA	NA		NA	NA
17	Ovary	2037	247290	0.00816999	249327	Soft tissue	-	-		-	-
18	Prostate	14556	195138	0.0694154	209694	-	Colon and Rectum	Non-hodgkin Lymphoma		Pancreas	Melanoma
19	Bladder	4076	455080	0.00887716	459156	-	-	Female breast, Non-hodgkin Lymphoma		-	-
20	Kidney	2375	456781	0.00517253	459156	Lung and Bronchus, Melanoma, nonhodgkin, myeloma	-	-		-	-
21	Renal Pelvis and Ureter	412	458744	0.000897299	459156	NA	NA	NA		NA	NA
22	Brain	1200	457956	0.00261349	459156	NA	NA	NA		NA	NA
23	Thyroid	827	458329	0.00180113	459156	-	-	-		Liver, Colon and Rectum	-
24	Hodgkin Lymphoma	532	458624	0.00115865	459156	NA	NA	NA		NA	NA
25	Non-Hodgkin Lymphoma	3765	455391	0.00819983	459156	NA	NA	NA		NA	NA
26	Myeloma	1333	457823	0.00290315	459156	-	Lung and Bronchus	-		-	-
27	Leukemia	2536	456620	0.00552318	459156	NA	NA	NA		NA	NA
Abbreviation: NA, not applicable

## Sheet: 2d
Supplementary file 2d. MR results between primary oral & pharyngeal cancer and second primary cancers.
No.	Second primary tumor site	UKB-two sample-Mendelian randomization with reported SNPs
		IVW			MR Egger			Pleiotropy			Heterogeneity (IVW)
		OR (95%CI)	P		OR (95%CI)	P		Intercept	P (intercept)		Q	P
1	Oral Cavity and Pharynx	-	-		-	-		-	-		-	-
2	Esophagus	1.25 (0.93-1.68)	0.14		1.22 (0.23-6.54)	0.83		0.00467	0.98		13.01	0.01
3	Stomach	1.19 (0.95-1.50)	0.14		1.77 (0.53-5.90)	0.42		0.14	0.55		6.04	0.2
4	Small Intestine	0.98 (0.68-1.42)	0.92		0.54 (0.08-3.81)	0.58		0.14	0.58		5.31	0.26
5	Colon and Rectum	0.98 (0.80-1.18)	0.8		0.65 (0.25-1.74)	0.46		0.09	0.47		29.11	7.42e-06
6	Liver	1.12 (0.91-1.38)	0.29		1.08 (0.33-3.48)	0.91		0.00866	0.95		4.11	0.39
7	Gallbladder	1.21 (0.75-1.97)	0.43		0.77 (0.05-11.54)	0.86		0.11	0.76		11.01	0.03
8	Pancreas	0.93 (0.79-1.10)	0.41		0.89 (0.40-1.97)	0.79		0.01	0.9		1.98	0.74
9	Larynx	0.99 (0.72-1.36)	0.97		0.68 (0.15-3.12)	0.65		0.09	0.65		2.06	0.73
10	Lung and Bronchus	1.00 (0.91-1.09)	0.96		0.82 (0.52-1.29)	0.46		0.05	0.45		1.95	0.75
11	Bones and Joints	1.26 (0.85-1.86)	0.25		4.56 (0.67-30.94)	0.22		-0.3	0.27		2.74	0.6
12	Soft Tissue including Heart	1.03 (0.87-1.22)	0.71		0.88 (0.39-1.97)	0.78		0.04	0.72		0.97	0.91
13	Melanoma of the Skin	1.07 (0.89-1.30)	0.13		2.35 (1.35-4.12)	0.06		-0.18	0.07		16.37	0.00256
14	Female Breast	1.04 (0.99-1.10)	0.11		1.07 (0.83-1.39)	0.62		-0.00675	0.84		2.75	0.6
15	Male Breast	1.28 (0.73-2.26)	0.39		0.65 (0.04-10.09)	0.78		0.16	0.65		1.74	0.78
16	Cervix Uteri	1.11 (0.85-1.46)	0.45		0.58 (0.15-2.17)	0.48		0.15	0.4		2.5	0.64
17	Ovary	1.14 (0.97-1.33)	0.13		1.41 (0.61-3.24)	0.48		-0.05	0.64		4.12	0.39
18	Prostate	1.00 (0.94-1.06)	0.92		1.07 (0.78-1.46)	0.72		-0.02	0.7		4.01	0.4
19	Bladder	1.03 (0.93-1.15)	0.56		0.89 (0.49-1.61)	0.72		0.04	0.64		4.2	0.38
20	Kidney	0.96 (0.79-1.17)	0.7		0.67 (0.25-1.84)	0.5		0.08	0.53		7.55	0.11
21	Renal Pelvis and Ureter	0.82 (0.51-1.32)	0.41		0.17 (0.03-1.15)	0.17		0.37	0.2		8.55	0.07
22	Brain	1.47 (0.97-2.22)	0.07		0.97 (0.10-9.78)	0.98		0.1	0.74		17.93	0.00127
23	Thyroid	1.13 (0.89-1.43)	0.32		0.99 (0.29-3.43)	0.99		0.03	0.85		3.5	0.48
24	Hodgkin Lymphoma	1.12 (0.83-1.49)	0.46		0.57 (0.14-2.36)	0.5		0.16	0.42		1.64	0.8
25	Non-Hodgkin Lymphoma	1.21 (1.08-1.35)	0.000896		1.54 (0.90-2.65)	0.21		-0.06	0.43		1.82	0.77
26	Myeloma	1.28 (1.06-1.54)	0.00955		0.76 (0.31-1.89)	0.6		0.12	0.34		2.43	0.66
27	Leukemia	1.10 (0.93-1.30)	0.25		1.54 (0.65-3.64)	0.02		-0.08	0.49		6.06	0.2
*MR-Egger results were presented due to the significant horizontal pleiotropy.

## Sheet: 2e
Supplementary file 2e. MR results between primary esophageal cancer and second primary cancers.
No.	Second primary tumor site	UKB-two sample-Mendelian randomization with reported SNPs
		IVW			MR Egger			Pleiotropy			Heterogeneity (IVW)
		OR (95%CI)	P		OR (95%CI)	P		Intercept	P (intercept)		Q	P
1	Oral Cavity and Pharynx	1.06 (0.83-1.36)	0.64		0.87 (0.16-4.84)	0.83		0.03	0.83		2.91	0.57
2	Esophagus	-	-		-	-		-	-		-	-
3	Stomach	1.19 (0.78-1.82)	0.41		1.11 (0.04-32.03)	0.95		0.01	0.97		8.08	0.09
4	Small Intestine	0.87 (0.52-1.47)	0.62		5.70 (0.16-208.05)	0.41		-0.24	0.38		4.17	0.38
5	Colon and Rectum	0.97 (0.87-1.09)	0.62		0.70 (0.32-1.54)	0.44		0.04	0.47		1.94	0.75
6	Liver	0.99 (0.68-1.43)	0.95		3.35 (0.24-47.33)	0.44		-0.16	0.43		5	0.29
7	Gallbladder	0.78 (0.44-1.39)	0.41		0.10 (0.00-4.30)	0.32		0.27	0.36		6.22	0.18
8	Pancreas	0.92 (0.71-1.19)	0.52		1.13 (0.15-8.70)	0.91		-0.03	0.85		4	0.41
9	Larynx	0.78 (0.48-1.27)	0.31		0.57 (0.02-16.65)	0.77		0.04	0.87		0.34	0.99
10	Lung and Bronchus	0.61 (0.73-1.20)	0.61		0.73 (0.10-5.17)	0.77		0.03	0.82		11.39	0.02
11	Bones and Joints	1.40 (0.75-2.58)	0.29		0.45 (0.01-36.28)	0.74		0.15	0.64		3.47	0.48
12	Soft Tissue including Heart	1.00 (0.68-1.46)	0.99		0.25 (0.02-3.46)	0.38		0.18	0.37		8.41	0.08
13	Melanoma of the Skin	1.09 (0.86-1.38)	0.48		1.81 (0.29-11.17)	0.57		-0.07	0.62		10.47	0.03
14	Female Breast	1.00 (0.91-1.09)	0.92		0.63 (0.36-1.12)	0.11		0.06	0.21		4.39	0.36
15	Male Breast	1.02 (0.41-2.54)	0.97		1.27 (0.00-778.99)	0.95		-0.03	0.95		0.16	1
16	Cervix Uteri	1.61 (1.05-2.47)	0.03		1.00 (0.05-20.13)	1		0.06	0.77		0.56	0.97
17	Ovary	1.09 (0.86-1.38)	0.49		2.17 (0.40-11.64)	0.43		-0.09	0.48		2.8	0.59
18	Prostate	1.02 (0.82-1.27)	0.83		0.92 (0.16-5.30)	0.93		0.01	0.91		22.65	0.000149
19	Bladder	0.87 (0.71-1.07)	0.19		0.32 (0.10-1.02)	0.15		0.13	0.19		6.02	0.2
20	Kidney	0.99 (0.79-1.24)	0.9		1.63 (0.28-9.31)	0.62		-0.06	0.61		4.25	0.37
21	Renal Pelvis and Ureter	0.81 (0.48-1.37)	0.43		0.29 (0.01-10.68)	0.55		0.13	0.61		2.81	0.59
22	Brain	0.78 (0.57-1.06)	0.12		0.64 (0.08-5.26)	0.7		0.03	0.86		1.54	0.82
23	Thyroid	0.76 (0.50-1.16)	0.21		0.11 (0.01-1.38)	0.19		0.25	0.23		5.32	0.26
24	Hodgkin Lymphoma	1.09 (0.69-1.74)	0.7		0.41 (0.02-10.03)	0.62		0.13	0.58		2.52	0.64
25	Non-Hodgkin Lymphoma	1.09 (0.83-1.44)	0.52		0.17 (0.05-0.57)	0.06		0.24	0.06		9.73	0.05
26	Myeloma	1.47 (0.86-2.52)	0.16		68.51 (7.54-622.51)	0.03		-0.49	0.04*		13.04	0.01
27	Leukemia	1.16 (0.94-1.43)	0.18		1.16 (0.26-5.18)	0.85		-0.000759	0.99		0.37	0.98
*MR-Egger results were presented due to the significant horizontal pleiotropy.

## Sheet: 2f
Supplementary file 2f. MR results between primary colorectal cancer and second primary cancers.
No.	Second primary tumor site	UKB-two sample-Mendelian randomization with reported SNPs
		IVW			MR Egger			Pleiotropy			Heterogeneity (IVW)
		OR (95%CI)	P		OR (95%CI)	P		Intercept	P (intercept)		Q	P
1	Oral Cavity and Pharynx	0.96 (0.69-1.34)	0.82		1.69 (0.35-8.26)	0.54		-0.07	0.5		14.7	0.04
2	Esophagus	0.99 (0.78-1.26)	0.92		1.30 (0.42-4.02)	0.67		-0.03	0.65		4.11	0.77
3	Stomach	1.06 (0.70-1.60)	0.78		1.47 (0.19-11.20)	0.72		-0.04	0.76		16.11	0.02
4	Small Intestine	1.24 (0.78-1.97)	0.36		2.52 (0.28-23.00)	0.44		-0.08	0.54		7.04	0.42
5	Colon and Rectum	-	-		-	-		-	-		-	-
6	Liver	1.36 (1.00-1.84)	0.047		0.56 (0.13-2.35)	0.46		0.1	0.26		4.12	0.77
7	Gallbladder	1.18 (0.77-1.80)	0.45		1.81 (0.25-13.03)	0.58		-0.05	0.68		4.9	0.67
8	Pancreas	0.91 (0.72-1.16)	0.45		0.85 (0.28-2.60)	0.79		0.01	0.9		2.33	0.94
9	Larynx	1.04 (0.59-1.83)	0.89		0.79 (0.04-14.30)	0.88		0.03	0.86		10.8	0.15
10	Lung and Bronchus	1.05 (0.85-1.29)	0.64		1.88 (0.75-4.76)	0.23		-0.07	0.25		16.69	0.02
11	Bones and Joints	0.81 (0.44-1.49)	0.5		0.73 (0.03-18.52)	0.86		0.01	0.95		7.86	0.35
12	Soft Tissue including Heart	1.03 (0.81-1.32)	0.8		1.32 (0.43-4.08)	0.65		-0.03	0.68		1.39	0.99
13	Melanoma of the Skin	0.94 (0.79-1.12)	0.52		1.04 (0.43-2.52)	0.93		-0.01	0.83		11.79	0.11
14	Female Breast	1.00 (0.91-1.11)	0.97		0.87 (0.53-1.44)	0.62		0.02	0.6		12.25	0.09
15	Male Breast	1.49 (0.61-3.64)	0.38		0.42 (0.01-31.18)	0.71		0.15	0.58		7.72	0.36
16	Cervix Uteri	1.20 (0.74-1.94)	0.46		0.68 (0.06-7.23)	0.76		0.07	0.64		10.5	0.16
17	Ovary	1.08 (0.79-1.49)	0.61		0.43 (0.10-1.74)	0.28		0.11	0.23		14.38	0.04
18	Prostate	1.42 (0.83-2.45)	0.2		1.32 (0.09-20.41)	0.85		0.01	0.96		285.96	6.01e-58
19	Bladder	0.90 (0.73-1.12)	0.36		0.58 (0.21-1.65)	0.35		0.05	0.43		13.38	0.06
20	Kidney	0.99 (0.81-1.22)	0.95		0.73 (0.28-1.90)	0.55		0.04	0.55		1.69	0.97
21	Renal Pelvis and Ureter	0.93 (0.56-1.55)	0.78		0.54 (0.04-7.15)	0.65		0.06	0.69		7.72	0.36
22	Brain	0.92 (0.69-1.22)	0.56		0.58 (0.15-2.21)	0.45		0.05	0.51		1.55	0.98
23	Thyroid	1.24 (0.88-1.74)	0.22		2.42 (0.49-11.86)	0.32		-0.08	0.43		2.66	0.91
24	Hodgkin Lymphoma	0.85 (0.54-1.35)	0.49		1.21 (0.12-12.33)	0.88		-0.04	0.77		7.96	0.34
25	Non-Hodgkin Lymphoma	1.00 (0.83-1.19)	0.96		1.30 (0.54-3.14)	0.58		-0.03	0.56		8.72	0.27
26	Myeloma	1.00 (0.71-1.40)	0.99		3.07 (0.73-12.94)	0.18		-0.13	0.17		11.22	0.13
27	Leukemia	0.98 (0.80-1.19)	0.82		0.91 (0.36-2.28)	0.85		0.01	0.88		3.33	0.85
*MR-Egger results were presented due to the significant horizontal pleiotropy.

## Sheet: 2g
Supplementary file 2g. MR results between primary pancreatic cancer and second primary cancers.
No.	Second primary tumor site	UKB-two sample-Mendelian randomization with reported SNPs
		IVW			MR Egger			Pleiotropy			Heterogeneity (IVW)
		OR (95%CI)	P		OR (95%CI)	P		Intercept	P (intercept)		Q	P
1	Oral Cavity and Pharynx	1.05 (0.91-1.22)	0.48		0.82 (0.49-1.37)	0.46		0.04	0.33		18.15	0.15
2	Esophagus	1.08 (0.92-1.25)	0.35		0.84 (0.49-1.45)	0.55		0.04	0.37		17.89	0.16
3	Stomach	1.06 (0.90-1.25)	0.49		0.78 (0.44-1.39)	0.42		0.05	0.3		16.57	0.22
4	Small Intestine	1.05 (0.82-1.35)	0.71		2.75 (1.16-6.54)	0.04		-0.17	0.04*		11.79	0.54
5	Colon and Rectum	1.03 (0.95-1.12)	0.46		1.01 (0.75-1.36)	0.94		0.00337	0.9		26.67	0.01
6	Liver	1.06 (0.86-1.30)	0.6		1.99 (1.03-3.82)	0.06		-0.11	0.07		20.59	0.08
7	Gallbladder	1.48 (1.17-1.88)	0.00106		3.43 (1.56-7.55)	0.00984		-0.15	0.05*		13.63	0.4
8	Pancreas	-	-		-	-		-	-		-	-
9	Larynx	1.31 (1.03-1.67)	0.03		0.93 (0.40-2.16)	0.87		0.06	0.42		6.14	0.94
10	Lung and Bronchus	0.91 (0.78-1.07)	0.26		1.07 (0.61-1.87)	0.82		-0.03	0.58		58.86	8.41e-08
11	Bones and Joints	1.19 (0.87-1.63)	0.27		1.46 (0.48-4.47)	0.52		-0.04	0.72		13.46	0.41
12	Soft Tissue including Heart	1.02 (0.89-1.17)	0.77		0.92 (0.58-1.46)	0.72		0.02	0.65		6.27	0.94
13	Melanoma of the Skin	1.18 (0.98-1.42)	0.08		1.27 (0.65-2.47)	0.5		-0.01	0.84		84.26	1.73e-12
14	Female Breast	1.00 (0.94-1.08)	0.9		0.80 (0.64-1.00)	0.07		0.04	0.06		37.74	0.000317
15	Male Breast	0.74 (0.45-1.22)	0.24		0.88 (0.14-5.48)	0.9		-0.03	0.85		14.77	0.32
16	Cervix Uteri	1.00 (0.76-1.32)	0.98		1.59 (0.62-4.10)	0.36		-0.08	0.34		21.92	0.06
17	Ovary	0.93 (0.81-1.07)	0.31		0.84 (0.51-1.37)	0.5		0.02	0.67		16.9	0.2
18	Prostate	1.01 (0.88-1.15)	0.93		0.69 (0.46-1.04)	0.1		0.07	0.09		101.77	7.53e-16
19	Bladder	0.98 (0.83-1.16)	0.85		0.93 (0.51-1.70)	0.82		0.01	0.85		50.48	2.47e-06
20	Kidney	0.90 (0.79-1.01)	0.07		0.74 (0.48-1.14)	0.2		0.03	0.39		15.67	0.27
21	Renal Pelvis and Ureter	0.77 (0.56-1.04)	0.09		0.81 (0.27-2.48)	0.72		-0.01	0.92		17.53	0.18
22	Brain	1.08 (0.92-1.26)	0.34		1.07 (0.62-1.84)	0.81		0.00151	0.97		8.38	0.82
23	Thyroid	1.06 (0.88-1.28)	0.53		1.97 (1.03-3.78)	0.06		-0.11	0.08		12.84	0.46
24	Hodgkin Lymphoma	1.06 (0.83-1.34)	0.64		1.35 (0.59-3.08)	0.49		-0.04	0.55		12.03	0.53
25	Non-Hodgkin Lymphoma	0.98 (0.90-1.07)	0.64		0.89 (0.65-1.22)	0.49		0.02	0.56		12.64	0.48
26	Myeloma	1.15 (1.00-1.34)	0.06		1.28 (0.76-2.16)	0.37		-0.02	0.69		13.04	0.44
27	Leukemia	1.07 (0.96-1.19)	0.21		0.81 (0.56-1.18)	0.85		0.05	0.15		9.84	0.71
*MR-Egger results were presented due to the significant horizontal pleiotropy.

## Sheet: 2h
Supplementary file 2h. MR results between primary lung cancer and second primary cancers.
No.	Second primary tumor site	UKB-two sample-Mendelian randomization with reported SNPs
		IVW			MR Egger			Pleiotropy			Heterogeneity (IVW)
		OR (95%CI)	P		OR (95%CI)	P		Intercept	P (intercept)		Q	P
1	Oral Cavity and Pharynx	0.97 (0.69-1.36)	0.86		2.28 (0.82-6.34)	0.18		-0.1	0.15		11.53	0.07
2	Esophagus	0.96 (0.66-1.40)	0.82		2.11 (0.61-7.30)	0.29		-0.09	0.25		12.78	0.05
3	Stomach	0.93 (0.61-1.41)	0.73		2.26 (0.58-8.78)	0.29		-0.11	0.24		12.1	0.06
4	Small Intestine	1.15 (0.45-2.94)	0.77		1.65 (0.05-59.24)	0.79		-0.04	0.84		20.14	0.00262
5	Colon and Rectum	1.03 (0.86-1.23)	0.74		0.89 (0.46-1.73)	0.76		0.02	0.68		14.88	0.02
6	Liver	1.12 (0.75-1.67)	0.57		2.90 (0.84-9.94)	0.15		-0.11	0.18		8.85	0.18
7	Gallbladder	0.70 (0.41-1.20)	0.2		1.81 (0.28-11.88)	0.56		-0.11	0.35		8.48	0.21
8	Pancreas	0.65 (0.40-1.05)	0.08		0.66 (0.11-4.10)	0.67		-0.00151	0.99		21.53	0.00147
9	Larynx	0.85 (0.53-1.38)	0.51		2.54 (0.47-13.62)	0.33		-0.13	0.24		2.23	0.9
10	Lung and Bronchus	-	-		-	-		-	-		-	-
11	Bones and Joints	0.50 (0.27-0.91)	0.02		0.74 (0.09-6.13)	0.79		-0.05	0.71		4	0.57
12	Soft Tissue including Heart	0.99 (0.76-1.29)	0.96		0.72 (0.29-1.80)	0.51		0.04	0.5		5.29	0.51
13	Melanoma of the Skin	0.68 (0.44-1.04)	0.07		0.42 (0.09-2.08)	0.34		0.06	0.57		54.13	6.95e-10
14	Female Breast	0.86 (0.78-0.95)	0.0018		0.89 (0.62-1.27)	0.54		-0.00357	0.87		7.79	0.25
15	Male Breast	1.37 (0.36-5.15)	0.64		0.02 (325.24)	0.77		-0.06	0.85		12.36	0.05
16	Cervix Uteri	1.17 (0.77-1.79)	0.46		1.09 (0.25-4.79)	0.91		0.01	0.93		3.82	0.7
17	Ovary	0.87 (0.69-1.10)	0.25		1.23 (0.54-2.78)	0.65		-0.04	0.43		4.79	0.57
18	Prostate	0.96 (0.74-1.23)	0.73		0.89 (0.34-2.33)	0.81		0.01	0.88		45.73	3.35e-08
19	Bladder	1.17 (0.77-1.76)	0.47		1.84 (0.40-8.45)	0.47		-0.05	0.57		36.42	2.29e-06
20	Kidney	1.02 (0.76-1.38)	0.87		1.06 (0.34-3.34)	0.92		-0.00428	0.95		11.04	0.09
21	Renal Pelvis and Ureter	1.00 (0.51-1.94)	0.99		1.75 (0.14-21.59)	0.68		-0.07	0.66		9.65	0.14
22	Brain	1.00 (0.73-1.36)	1		0.92 (0.31-2.72)	0.89		0.01	0.88		4.35	0.63
23	Thyroid	0.83 (0.57-1.20)	0.31		0.93 (0.25-3.40)	0.92		-0.01	0.86		2.84	0.83
24	Hodgkin Lymphoma	1.70 (1.05-2.76)	0.03		5.66 (1.19-27.07)	0.08		-0.15	0.18		6.86	0.33
25	Non-Hodgkin Lymphoma	1.24 (0.77-1.98)	0.38		3.29 (0.70-15.40)	0.19		-0.12	0.25		45.56	3.62e-08
26	Myeloma	1.04 (0.70-1.53)	0.85		0.67 (0.16-2.78)	0.6		0.05	0.55		10.7	0.1
27	Leukemia	1.18 (0.84-1.64)	0.34		1.09 (0.31-3.86)	0.9		0.01	0.91		15.09	0.02
*MR-Egger results were presented due to the significant horizontal pleiotropy.

## Sheet: 2i
Supplementary file 2i. MR results between primary melanoma and second primary cancers.
No.	Second primary tumor site	UKB-two sample-Mendelian randomization with reported SNPs
		IVW			MR Egger			Pleiotropy			Heterogeneity (IVW)
		OR (95%CI)	P		OR (95%CI)	P		Intercept	P (intercept)		Q	P
1	Oral Cavity and Pharynx	1.09 (0.97-1.22)	0.13		1.21 (0.91-1.61)	0.2		-0.02	0.43		15.04	0.52
2	Esophagus	1.10 (0.95-1.26)	0.19		1.15 (0.80-1.66)	0.46		-0.01	0.79		22.66	0.12
3	Stomach	1.03 (0.89-1.19)	0.73		0.98 (0.67-1.45)	0.93		0.01	0.82		18.95	0.27
4	Small Intestine	0.97 (0.77-1.22)	0.79		0.83 (0.45-1.53)	0.56		0.03	0.6		14.67	0.55
5	Colon and Rectum	1.04 (0.98-1.10)	0.25		0.98 (0.84-1.15)	0.83		0.01	0.48		21.22	0.17
6	Liver	1.07 (0.90-1.27)	0.43		1.23 (0.79-1.91)	0.37		-0.02	0.51		20.91	0.18
7	Gallbladder	0.98 (0.87-1.12)	0.81		1.05 (0.75-1.46)	0.79		-0.01	0.7		43.29	0.000253
8	Pancreas	1.04 (0.89-1.21)	0.65		0.79 (0.53-1.16)	0.25		0.05	0.16		28.82	0.03
9	Larynx	1.06 (0.85-1.32)	0.61		0.97 (0.55-1.73)	0.93		0.01	0.76		9.94	0.87
10	Lung and Bronchus	1.06 (0.96-1.16)	0.25		1.00 (0.78-1.28)	0.98		0.01	0.66		32	0.01
11	Bones and Joints	1.28 (0.92-1.77)	0.14		1.77 (0.78-4.00)	0.19		-0.06	0.41		22.19	0.14
12	Soft Tissue including Heart	1.01 (0.90-1.14)	0.82		1.03 (0.76-1.40)	0.83		-0.00341	0.89		12	0.74
13	Melanoma of the Skin	-	-		-	-		-	-		-	-
14	Female Breast	1.07 (1.00-1.15)	0.04		1.06 (0.89-1.26)	0.54		0.00264	0.86		51.86	1.15e-05
15	Male Breast	0.94 (0.60-1.47)	0.77		0.59 (0.17-1.99)	0.41		0.08	0.43		17.35	0.36
16	Cervix Uteri	0.89 (0.73-1.09)	0.27		0.60 (0.36-1.00)	0.07		0.07	0.12		17.52	0.35
17	Ovary	0.98 (0.86-1.12)	0.76		1.00 (0.71-1.42)	0.99		-0.00405	0.89		24.58	0.08
18	Prostate	1.01 (0.92-1.11)	0.78		1.01 (0.79-1.29)	0.92		-3.41e-05	1		79.23	2.29e-10
19	Bladder	0.98 (0.87-1.12)	0.81		1.05 (0.75-1.46)	0.79		-0.01	0.7		43.29	0.00253
20	Kidney	1.05 (0.93-1.17)	0.44		1.08 (0.79-1.46)	0.64		-0.00495	0.85		21.43	0.16
21	Renal Pelvis and Ureter	0.99 (0.77-1.28)	0.94		1.11 (0.57-2.17)	0.76		-0.02	0.71		18.32	0.31
22	Brain	1.03 (0.90-1.19)	0.64		0.86 (0.60-1.23)	0.41		0.03	0.29		15.44	0.49
23	Thyroid	0.94 (0.76-1.16)	0.55		1.21 (0.69-2.11)	0.52		-0.04	0.35		25.92	0.06
24	Hodgkin Lymphoma	1.02 (0.81-1.28)	0.84		0.94 (0.52-1.72)	0.85		0.01	0.78		18.59	0.29
25	Non-Hodgkin Lymphoma	1.09 (0.99-1.20)	0.09		1.12 (0.88-1.44)	0.38		-0.01	0.79		23.3	0.11
26	Myeloma	1.11 (0.91-1.36)	0.32		1.27 (0.75-2.18)	0.39		-0.02	0.59		37.95	0.00154
27	Leukemia	1.15 (0.97-1.36)	0.11		1.10 (0.70-1.73)	0.68		0.01	0.84		50.53	1.89e-05
*MR-Egger results were presented due to the significant horizontal pleiotropy.

## Sheet: 2j
Supplementary file 2j. MR results between primary female breast cancer and second primary cancers.
No.	Second primary tumor site	UKB-two sample-Mendelian randomization with reported SNPs
		IVW			MR Egger			Pleiotropy			Heterogeneity (IVW)
		OR (95%CI)	P		OR (95%CI)	P		Intercept	P (intercept)		Q	P
1	Oral Cavity and Pharynx	0.95 (0.86-1.05)	0.32		0.86 (0.71-1.05)	0.15		0.01	0.26		104.32	0.45
2	Esophagus	1.09 (0.97-1.21)	0.14		1.14 (0.92-1.42)	0.25		-0.00405	0.63		115.91	0.18
3	Stomach	1.04 (0.92-1.17)	0.52		1.04 (0.83-1.32)	0.71		-0.000448	0.96		82.35	0.93
4	Small Intestine	1.01 (0.83-1.24)	0.89		0.67 (0.45-1.00)	0.052		0.04	0.02*		99.71	0.57
5	Colon and Rectum	0.98 (0.93-1.04)	0.51		1.01 (0.91-1.12)	0.85		-0.00242	0.55		143.6	0.00509
6	Liver	1.16 (1.02-1.33)	0.02		0.97 (0.75-1.26)	0.82		0.02	0.12		105.82	0.4
7	Gallbladder	1.11 (0.92-1.33)	0.27		1.17 (0.81-1.68)	0.41		-0.00437	0.75		103.3	0.47
8	Pancreas	0.95 (0.84-1.06)	0.35		0.99 (0.79-1.25)	0.96		-0.00424	0.63		130.24	0.04
9	Larynx	0.97 (0.77-1.21)	0.78		1.10 (0.70-1.74)	0.68		-0.01	0.52		137.29	0.01
10	Lung and Bronchus	1.03 (0.96-1.10)	0.42		0.98 (0.86-1.11)	0.74		0.00424	0.39		130.45	0.04
11	Bones and Joints	0.95 (0.74-1.21)	0.67		1.14 (0.70-1.86)	0.59		-0.02	0.39		105.45	0.41
12	Soft Tissue including Heart	1.02 (0.92-1.14)	0.65		1.06 (0.86-1.30)	0.6		-0.0027	0.73		99.94	0.57
13	Melanoma of the Skin	1.02 (0.95-1.10)	0.56		1.06 (0.92-1.22)	0.45		-0.00288	0.59		155.63	0.000629
14	Female Breast	-	-		-	-		-	-		-	-
15	Male Breast	-	-		-	-		-	-		-	-
16	Cervix Uteri	1.01 (0.85-1.20)	0.89		1.01 (0.72-1.42)	0.89		0.0002	0.99		74.43	0.98
17	Ovary	1.03 (0.92-1.14)	0.63		1.09 (0.89-1.35)	0.4		-0.00545	0.49		125.13	0.07
18	Prostate	-	-		-	-		-	-		-	-
19	Bladder	1.00 (0.92-1.09)	0.97		0.91 (0.78-1.07)	0.26		0.01	0.18		147.52	0.00266
20	Kidney	1.02 (0.93-1.12)	0.7		0.98 (0.81-1.18)	0.8		0.00377	0.6		120.05	0.12
21	Renal Pelvis and Ureter	1.21 (0.98-1.50)	0.08		0.98 (0.64-1.50)	0.91		0.02	0.25		108.57	0.33
22	Brain	1.01 (0.89-1.14)	0.9		1.05 (0.82-1.35)	0.68		-0.00374	0.69		99.31	0.58
23	Thyroid	0.91 (0.79-1.06)	0.24		0.97 (0.72-1.30)	0.82		-0.00474	0.67		102.77	0.49
24	Hodgkin Lymphoma	0.92 (0.76-1.12)	0.4		0.97 (0.65-1.43)	0.86		-0.00426	0.78		118.35	0.14
25	Non-Hodgkin Lymphoma	0.98 (0.91-1.06)	0.69		1.06 (0.91-1.24)	0.48		-0.00631	0.29		132.97	0.03
26	Myeloma	1.05 (0.91-1.22)	0.5		0.90 (0.67-1.22)	0.51		0.01	0.25		168.43	5.04e-05
27	Leukemia	0.93 (0.85-1.03)	0.15		1.02 (0.85-1.23)	0.81		-0.01	0.27		127.61	0.05
*MR-Egger results were presented due to the significant horizontal pleiotropy.

[truncated: 6 more sheets: 2k, 2l, 2m, 2n, 2o, 2p]
